# Supplementary material
Source: PubMed Central journal article supplement (PMC6292203)
Supplement: NIHMS999338-supplement-1.pdf [file NIHMS999338-supplement-1.pdf]

**Supplemental Figure 1 A:** Sequence of Herceptin CAR (4D5-28Z).

The sequence is composed of following parts as indicated below the sequence:

Ig kappa chain signal peptide; 4D5 light chain variable region (4D5 VL);

218 peptide linker; 4D5 heavy chain variable region (4D5 VH);

Hinge, transmembrane and cytoplasmic region of human CD28 (CD28);

and cytoplasmic region of human CD3 $\zeta$  chain (CD3 zeta).

MDFQVQIFSLLISASVIMSRGDIQMTQSPSSLSASVGDRVITICRASQDV  
|← Ig kappa signal peptide →|-----  
NTAWAWYQQKPGKAPKLLIYSASFLYSGVPSRFSGSRSGTDFTLTISSLQP  
-----4D5 VL-----  
EDFATYYCQQHYTTPPTFGQGTKVEIKRTGSTSGSGKPGSGEGSEVQLV  
-----218 Linker-----  
ESGGGLVQPGGSLRLSCAASGFNIKDTYIHWVRQAPGKGLEWVARIYPT  
-----4D5 VH-----  
NGYTRYADSVKGRFTISADTSKNTAYLQMNSLRAEDTAVYYCSRWGGD  
-----  
GFYAMDVWGQGLVTVSSAAAIEVMYPPPYLDNEKSNGTIIHVKGKHL  
-----  
CPSPLFPGPSKPFVVLVVVGGVLACYSLLVTVAFIIFWVRSKRSRLLHSD  
-----CD28-----  
YMNMTPRRPGPTRKHYPYAPPRDFAAYRSRVKFSRSADAPAYQQGQN  
-----  
QLYNELNLGRREEYDVLDKRRGRDPEMGGKPRRKNPQEGLYNELQKD  
-----CD3 zeta-----  
KMAEAYSEIGMKGERRRGKGGHDGLYQGLSTATKDTYDALHMQUALPPR.  
-----

**Supplemental Figure 1 B:** Sequence of KDR-2C6 scFV.

The sequence is composed of following parts as indicated under the sequence:

Ig kappa chain signal peptide; KDR-2C6 light chain variable region (2C6 VL);

218 linker; KDR-2C6 heavy chain variable region (2C6 VH).

The rest of the molecule is identical to 4D5-28Z (see supplemental figure 1A).

MDFQVQIFSLLISASVIMSRGEIVMTQSPATLSLSPGERATLSCRASQSV  
|← Ig kappa signal peptide →|-----  
SSYLAWYQQKPGQAPRLLIYDSSNRATGIPARFSGSGSGTDFTLTISSLEP  
-----2C6 VL-----  
EDFATYYCLQHNTFPSTFGQGTKVEIKGSTSGSGKPGSGEGSEVQLVQS  
-----|←-----218 Linker-----|←-----  
GGGLVKPGGSLRLSCAASGFTFSSYSMNWVRQAPGKGLEWVSSISSSSS  
-----2C6 VH-----  
YIYYADSVKGRFTISRDNKNSLYLQMNSLRAEDTAVYYCARVTDAFDI  
-----  
WGQGMVTVSS  
-----→|

## Supplemental Figure 1 C.

Primers used to synthesis 4D5 and KDR-2C6 scFv were as shown.

### Primers for 4D5 scFv

| Primer  | sequences                               |
|---------|-----------------------------------------|
| 4D5S1   | ACTCTCGAGGCCACCATGGATTTTCAG             |
| 4D5S2   | GTGCAGATTTTCAGCTTCTGCTAATCAGTGCCTCAGT   |
| 4D5S3   | CATAATGTCCAGAGGAGATATCCAGATGACCCAGTCCC  |
| 4D5S4   | CGAGCTCCCTGTCCGCCTCTGTGGGCGATAGGGTCACC  |
| 4D5S5   | ATCACCTGCCGTGCCAGTCAAGATGTGAATACTGCTGT  |
| 4D5S6   | AGCCTGGTATCAACAGAAACCAGGAAAAGCTCCGAAAC  |
| 4D5S7   | TACTGATTACTCGGCATCCTTCTTATTCTGGAGTC     |
| 4D5S8   | CCTTCTCGCTTCTCTGATCTAGATCTGGGACGGATT    |
| 4D5S9   | CACTCTGACCATCAGCAGTCTGCAGCCGGAAGACTTCG  |
| 4D5S10  | CAACTTATTACTGTGACAAACATTATACTACTCCTCCC  |
| 4D5S11  | ACGTTTCGACAGGGTACCAAGGTGGAGATCAAAACGCAC |
| 4D5S12  | TGGGTCTACATCTGGATCTGGGAAGCCGGGTTCTGGTG  |
| 4D5S13  | AGGGTCTGAGGTTCACTGGTGGAGTCTGGCGGTGGC    |
| 4D5S14  | CTGGTGCAGCCAGGGGGCTCACTCCGTTTGTCTGTGC   |
| 4D5S15  | AGCTTCTGGCTTCAACATTAAGACACCTATATACT     |
| 4D5S16  | GGGTGCGTCAGGCCCGGGTAAAGGCCTGGAATGGGT    |
| 4D5S17  | GCAAGGATTTATCCTACGAATGGTTATACTAGATATGC  |
| 4D5S18  | CGATAGCGTCAAGGGCCGTTTACTATAAGCGCAGACA   |
| 4D5S19  | CATCCAAAACACAGCCTACCTGCAGATGAACAGCCTG   |
| 4D5S20  | CGTGTGAGGACACTGCCGTCTATTATTGTTCTAGATG   |
| 4D5S21  | GGGAGGGGACGGCTTCTATGCTATGACGCTGTGGGGTC  |
| 4D5S22  | AAGGAACCTGTGACCCAGTCTCCTCGGCGGCCGCTAA   |
| 4D5AS1  | ATAGGCGGCCCGCAGGAG                      |
| 4D5AS2  | ACGGTGACCAGGGTTCCTTGACCCACACGTCCATAGC   |
| 4D5AS3  | ATAGAAGCCGTCCCTCCCATCTAGAACAATAATAGA    |
| 4D5AS4  | CGGCAGTGTCTCAGCACGCAGGCTGTTCACTGCAGG    |
| 4D5AS5  | TAGGCTGTGTTTTGGATGTGTCTGCGCTTATAGTGAA   |
| 4D5AS6  | ACGGCCCTTGACGCTATCGGCATATCTAGTATAACCAT  |
| 4D5AS7  | TCGTAGGATAAATCCTTGCAACCCATTCCAGGCCCTTA  |
| 4D5AS8  | CCCGGGCCTGACGCACCCAGTGTATATAGGTGTCTTT   |
| 4D5AS9  | AATGTTGAAGCCAGAAGTGCACAGGACAAACGGAGTG   |
| 4D5AS10 | AGCCCCCTGGCTGCACCAGGCCACCCGAGACTCCACC   |
| 4D5AS11 | AGCTGAACCTCAGAACCCTCACCAGAACCCTCCCTCCC  |
| 4D5AS12 | AGATCCAGATGAGACCCAGTGCCTTTGATCTCCACT    |
| 4D5AS13 | TGGTACCCTGTCCGAACGTGGGAGGAGTAGTATAATGT  |
| 4D5AS14 | TGCTGACAGTAATAAGTTGCGAAGTCTTCCGGCTGCAG  |
| 4D5AS15 | ACTGCTGATGGTCAAGTGAATCCGTCAGATCTAG      |
| 4D5AS16 | ATCCAGAGAAGCGAGAGTGTGACCCATATCGCCACAC   |
| 4D5AS17 | GATGCCGAGTAAATCAGTAGTTTCCGGAGCTTTCTCTGG |
| 4D5AS18 | TTTCTGTTGATACCAGGCTACAGCAGTATTACATCCT   |
| 4D5AS19 | GACTGGCACGGCAGGTGATGGTACCCATATCGCCACAC  |
| 4D5AS20 | GAGGCGGACAGGAGCTCGGGGACTGGGTCACTGGAT    |
| 4D5AS21 | ATCTCTCTGGACATTATGACTGAGGCACTGATTAGCA   |
| 4D5AS22 | GGAAGCTGAAAATCTGCACCTGAAAATCCATGGTGGCT  |

### Primers for 2C6 scFv

| Primer   | Sequences                               |
|----------|-----------------------------------------|
| 2C6-S1   | TTTGGCAAACCTCGAGGCCA                    |
| 2C6-S2   | CCATGGACTTTCAGGTCCAGATCTTCTCTCTCTGCTC   |
| 2C6-S3   | ATTAGTGCCAGCGTTATTATGTGCGGAGGGGAAATCGT  |
| 2C6-S4   | GATGACCCAATCACCGGCCACTCTCTCGTTGCCCCCG   |
| 2C6-S5   | GAGAGCGGCCACACTCTCATGTAGAGTTCCTCCAGTCC  |
| 2C6-S6   | GTTTCGTCTACCTCGCGTGGTACCAGGAAAAGCCCGG   |
| 2C6-S7   | GCAGGCTCCCGGCTCTGATCTACGACAGTCTGAACA    |
| 2C6-S8   | GGGCCACCGGTATCCAGCTCGCTTCTCCGGGTCGGGG   |
| 2C6-S9   | TCCGGCACAGACTTCACCCGTGACAATCTCTCGTGGGA  |
| 2C6-S10  | GCCCGAGGACTTCGCCACTTACTACTGTCTGCAGCATA  |
| 2C6-S11  | ACACATTCCCGTCGACGTTTCGGCCAGGGCACTAAGGTG |
| 2C6-S12  | GAAATTAAGGGTCTACCTCCGGTCTGGGAAGCCCTGG   |
| 2C6-S13  | CTCAGGCGAGGGCTCCGAGGTACAACCTCGTGCAGAGTG |
| 2C6-S14  | GCGGAGGTCTGGTCAAGCCCGGGGCTCCCTGAGGCTG   |
| 2C6-S15  | TCCTGTGCAGCCAGCGGGTTCACGTTCTCGTCTTACAG  |
| 2C6-S16  | TATGAACTGGGTGCGTCAGGCGCCTGGGAAGGGACTTG  |
| 2C6-S17  | AGTGGGTGTCTCCATCTCCAGCTTCTCCATACATA     |
| 2C6-S18  | TACTACGCGGACAGTGTCAAGGGGAGGTTTACAATCTC  |
| 2C6-S19  | GCGGGATAACGCCAAGAATTCAGTACTTGCAGATGA    |
| 2C6-S20  | ACTCCCTACGAGCCGAAGACACCGCCGTGATTACTGC   |
| 2C6-S21  | GCCCGCGTGACAGACGCCCTTTGACATTTGGGGCCAGGG |
| 2C6-S22  | CAGGATGGTGACAGTGTCTCCGCGGGCCGAACAGTCT   |
| 2C6-AS1  | AGACTGTTGCGGCCGCGGA                     |
| 2C6-AS2  | GGACTGTCCACATCGTGCCTGGCCCAAATGTCAA      |
| 2C6-AS3  | AGGCGTCTGTACGCGGGGCGAGTAATACAGCGCGGTG   |
| 2C6-AS4  | TCTTCGGCTCGTAGGGAGTTCATCTGCAAGTACAGTGA  |
| 2C6-AS5  | ATTCTTGGCGTTATCCCGGAGATTGTAACCTCCCT     |
| 2C6-AS6  | TGACTGTCCGCGTAGTATATGTATGAGGAAGAGCTG    |
| 2C6-AS7  | GAGATGGAAGACACCCACTCAAGTCCCTCCAGGCCG    |
| 2C6-AS8  | CTGACGCACCCAGTTCATACTGTAAGACGAGAACGTGA  |
| 2C6-AS9  | ACCCGCTGGCTGCACAGGACAGCCTCAGGGAGCCGCC   |
| 2C6-AS10 | GGCTTGACCAGACCTCCGCCACTTGCACAGGATTTGAC  |
| 2C6-AS11 | CTCGGAGCCCTCGCTGAGCCAGGCTTCCAGAACCCG    |
| 2C6-AS12 | AGGTAGAACCCTTAATTTCCACTTAGTGCCCTGGCCG   |
| 2C6-AS13 | AACGTCGACGGGAATGTGTTATGCTGCAGACAGTAGTA  |
| 2C6-AS14 | AGTGGCGAAGTCTCTCGGGCTCCAGCGAGGAGATTGTCA |
| 2C6-AS15 | GGGTGAAGTCTGTGCCGGACCCCGACCCGGAAGCGGA   |
| 2C6-AS16 | GCTGGGATACCGGTGGCCCTGTTGAGCTGTCTAGAT    |
| 2C6-AS17 | CAGGAGCCGGGAGCCTGCCCGGGCTTTGCTGGTACC    |
| 2C6-AS18 | ACGCGAGGTAGGACGAAACGGACTGGGAAGCTCTACAT  |
| 2C6-AS19 | GAGAGTGTGGCGCTCTCCGGGGGACAACGAGAGAGT    |
| 2C6-AS20 | GGCCGGTGATTGGGTCACTACGATTTCCCTCGCGACA   |
| 2C6-AS21 | TAATAACGCTGGCACTAATGAGCAGGAAGGAGAAGATC  |
| 2C6-AS22 | TGGACTGAAAGTCCATGGTGGCCTCGAGTTTCCAAA    |



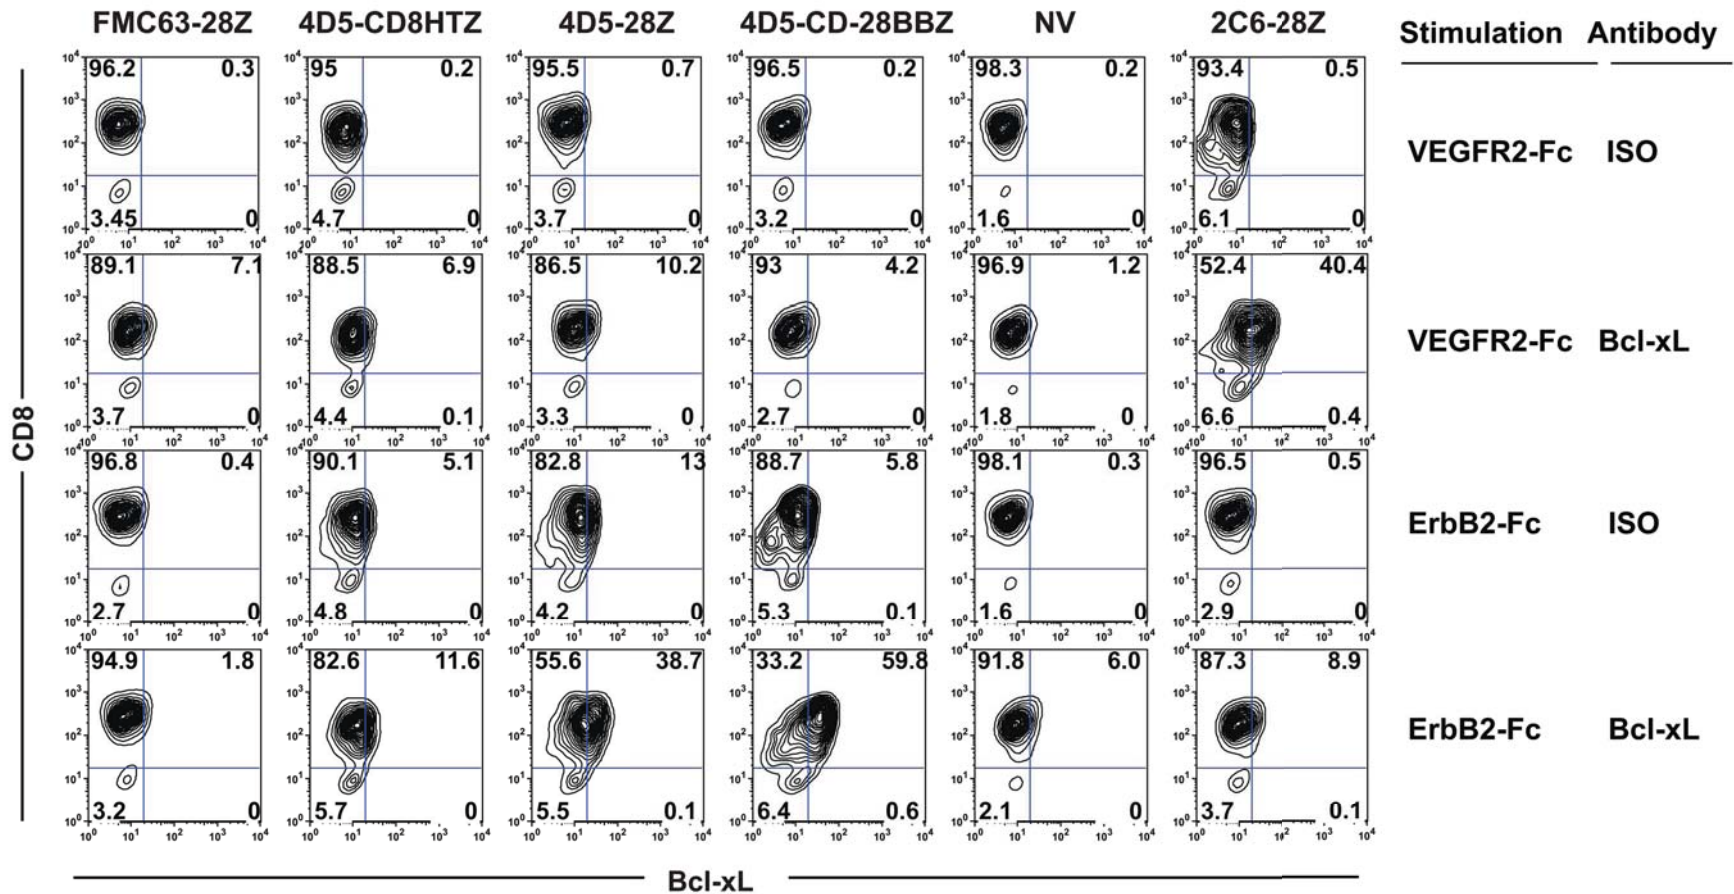

**Supplemental figure 3.** PBLs transduced with 4-1BB upregulate Bcl-xL.

PBLs transduced with 4D5 CARs with signaling moiety of CD3 $\zeta$  alone (4D5-CD8HTZ), CD28 and CD3 $\zeta$  (4D5-28Z) or CD28, 4-1BB and CD3 $\zeta$  (4D5-CD8-28BBZ) were sorted using ErbB2-Fc to over 98% purity. Controls were; PBLs expressing the CD19 CAR (FMC63-28Z), sorted using anti-mouse IgG Ab, and PBL expressing the anti-VEGFR2 CAR (2C6-28Z) sorted using VEGFR2-Fc, non-transduced PBLs (NV) were also used as control. T cells were stimulated with ErbB2-Fc or VEGFR2-Fc coated plate for 17h, and subjected to intracellular staining for Bcl-xL and CD8.
